# Supplementary material for: Expression Levels of Detoxification Enzyme Genes from Dendroctonus armandi (Coleoptera: Curculionidae) Fed on a Solid Diet Containing Pine Phloem and Terpenoids
Source: MDPI journal article supplement (doi:10.3390/insects12100926), 2021-10-11
Supplement: s1 [file s1]

**Supplementary material Table S1.** Primers used for RT-qPCR.

| Gene           | Accession No. | Sequence (5' to 3')                                                | Efficiency (%) | TM (°C) | Amplicon length |
|----------------|---------------|--------------------------------------------------------------------|----------------|---------|-----------------|
| CYP345E4       | KR012828      | F-TTATTGAAGAAAGCCAGGACA<br>R-CACGGACGCAAAGTTCATACA                 | 104.7          | 61      | 141             |
| CYP6BX1        | KR012820      | F-TGACGGCATTCTTTCTTAT<br>R-CATCACTTCCTGGTACTACAT                   | 96.1           | 60      | 140             |
| CYP6DF1        | KR012847      | F-GGAGGCGTCTACTGGGCGTTTA<br>R-CGCCACTGCTCGCCAGGTAA                 | 92.0           | 59      | 167             |
| CYP6DJ2        | KR012845      | F-AAATGTGACCCGTGTATGTG<br>R-TTCGGAATAAATCGTTCTGG                   | 93.2           | 61      | 159             |
| <i>DaGSTe1</i> | KJ637332      | F-TTTGGGCTTGGATGTAGAAT<br>R-TTGAAGTGTTGGAACCGTGT                   | 103.9          | 60      | 106             |
| <i>DaGSTe4</i> | KP258220      | F-TGATGACGGCTCGAATA<br>R-GCATGACTGTCCCAAAT                         | 98.4           | 60      | 154             |
| <i>DaGSTs1</i> | KP258218      | F-TAATGAAGGAACCAGACCCAA<br>R-GTCCAATAGCACGGCAAAGA                  | 94.5           | 60      | 170             |
| <i>DaGSTs2</i> | KP258219      | F-GGAATACTCCTGCTGGTCAAC<br>R-CGTATCAACGGCGGCATCAAT                 | 96.8           | 53      | 153             |
| <i>DaCarE3</i> | MG676376      | F-AGATGCAGCAGAGGACAGTCACAT<br>G<br>R-GCTCCATTACGAAGACCGCCACCA<br>T | 94.7           | 60      | 171             |
| <i>DaCarE4</i> | MG676377      | F-GGCAATATTCGTATGCAGCGGCGT<br>T<br>R-CCAGGTCGTTTCGGCTTCGTGAGTT     | 103.8          | 66      | 144             |
| $\beta$ -actin | KJ507199      | F-TGTTGCGGCTCTTGTCGTTGA<br>R-ACCCATACCGACCATCACTCC                 | 93.4           | 60      | 133             |

F= Forward primer, R= Reverse primer
